# Supplementary material
Source: PubMed Central journal article supplement (PMC7486844)
Supplement: ciz973_suppl_supplementary_figures.pdf [file ciz973_suppl_supplementary_figures.pdf]

1 **Long-term Persistence of an Extensively Drug Resistant Subclade of Globally Distributed**  
2 ***Pseudomonas aeruginosa* Clonal Complex 446 in an Academic Medical Center**

3  
4 **SUPPLEMENTARY MATERIALS**

5  
6 **SUPPLEMENTARY METHODS**

7 **Antimicrobial Resistance Determination**

8 Minimal inhibitory concentrations (MICs) were determined in triplicate using the broth  
9 microdilution protocol by Wiegand, et al. [1] and are reported in Supplementary Table 2 and  
10 Table 2. The following antibiotics were prepared from commercially available sources and were  
11 used to assess MICs: gentamicin, cefepime, ceftazidime, piperacillin-tazobactam, meropenem,  
12 aztreonam, ciprofloxacin, and colistin. Where discordant values were obtained, the median was  
13 used. Isolates were classified as susceptible or non-susceptible (intermediate and resistant) to  
14 each antibiotic based on 2018 Clinical and Laboratory Standards Institute (CLSI) breakpoints  
15 [2]. An isolate was classified as multidrug resistant (MDR) if it was non-susceptible to at least  
16 one antibiotic from  $\geq 3$  classes tested and classified as extensively drug resistant (XDR) if non-  
17 susceptible to at least one antibiotic from  $\geq 5$  classes tested (susceptible to antibiotics tested  
18 from  $\leq 2$  classes) [3].

19 Susceptibility to ceftazidime-avibactam and ceftolozane-tazobactam was assessed  
20 through Kirby-Bauer disk diffusion testing using HardyDisk AST disks (Hardy Diagnostics).  
21 Isolates were classified as susceptible or non-susceptible based on 2018 CLSI breakpoints [2].

22 **BURST Analysis**

23 To investigate the relationships between ST298, ST446, and other related sequence  
24 types, BURST analysis was performed using the goeBURST algorithm [4] as implemented in  
25 PHYLOViZ (v2.0) [5], and the resulting clonal complex containing these sequence types was

26 identified. All *Pseudomonas aeruginosa* sequence types listed in the PubMLST database  
27 (accessed August 12, 2019) were considered [6].

## 28 **Whole Genome Sequencing**

29 To construct a complete genome sequence for PABL048, long-read sequencing was  
30 performed on a PacBio RS II machine at the University of Maryland Institute for Genome  
31 Sciences. PacBio raw data were corrected and assembled using HGAP assembler (SMRT  
32 Analysis 2.3.0), Canu assembler v1.2, and Celera assembler v8.2. The assemblers were run  
33 using default settings. Resulting contigs were combined and circularized using Circlator v1.5.1.  
34 The final assembly was polished using Quiver (SMRT Analysis 2.3.0). Indel errors were  
35 corrected with Pilon v1.21 using 100-bp paired-end reads generated on an Illumina HiSeq 2000  
36 system, with an average read coverage of 190-fold. The genome was annotated through the  
37 NCBI Prokaryotic Genome Annotation Pipeline [7] and has been deposited to GenBank with the  
38 accession numbers CP039293.1 (chromosome) and CP039294.1 (plasmid). Potential virulence  
39 factors present within the PABL048 chromosome and plasmid were identified using the  
40 VFAnalyzer pipeline to screen against the virulence factor database (VFDB) [8].

41 CC446 isolates were whole genome sequenced using Illumina HiSeq and MiSeq  
42 platforms. Sequencing was performed at Northwestern University Feinberg School of Medicine  
43 and at the University of Maryland Institute for Genome Sciences. Reads were trimmed using  
44 Trimmomatic (v0.36) [9] to remove low-quality bases and assembled into contigs using SPAdes  
45 (v3.9.1) [10]. Contigs shorter than 200 bp were filtered out. Short-read sequencing was  
46 additionally performed to investigate heterogenous plasmid presence in PABL036 and PABL067  
47 and to confirm plasmid curing in PABL048 using a MiSeq Reagent Kit v3 (600 cycle) on an  
48 Illumina MiSeq instrument to yield 2 x 300 bp paired-end reads.

## 49 **Sequence Alignment**

50 All CC446 genomes were aligned to the complete genome sequence of PABL048, with  
51 separate alignments to the PABL048 chromosome and pPABL048 plasmid. For isolates with

52 reads available (Supplementary Table 1), read-trimming was performed with Trimmomatic  
53 (v0.36) [9] to remove low quality bases, and alignment was then performed using BWA (v0.7.15)  
54 with the BWA-MEM algorithm [11]. Single nucleotide variants (SNVs) relative to the reference  
55 were called using the mpileup function of samtools (v0.1.19-44428cd) [12, 13] with the following  
56 settings: -E (recalculate extended BAQ), -M 0 (cap mapping quality at 0), -Q 25 (skip bases with  
57 BAQ less than 25), -q 30 (skip alignments with mapQ less than 30), -m 2 (minimum gapped  
58 reads for indel candidates of 2), -D (output per-sample DP in binary call format [BCF]), -S  
59 (output per-sample strand bias P-value in BCF), and -g (generate BCF output). SNVs were  
60 filtered if they failed to meet 1 or more of the following criteria: minimum SNV quality score of  
61 200, minimum read consensus of 75%, minimum of 5 reads covering the SNV position,  
62 maximum of 3 times the median read depth of the total alignment, minimum of 1 read in either  
63 direction covering the SNV position, homozygous under the diploid model, and not within a  
64 repetitive region as determined by BLAST alignment of fragments of the reference sequence  
65 against itself. Any positions in the reference sequence with SNVs that passed the above filters  
66 were changed to the SNV base. Positions with SNVs that did not pass the above filters were  
67 changed to a missing base character. Non-SNV positions with coverage of fewer than 5 reads  
68 were also changed to a missing base character. For 13 NCBI genomes usable reads were not  
69 available, so draft genome contigs were aligned to PABL048 using NUCmer (v3.1) [14] with  
70 SNVs within repetitive regions masked (replaced with "N").

71 For subsequent phylogenetic analysis, alignments of all CC446 isolates to the PABL048  
72 chromosome were concatenated into a single fasta file. The core genome was defined as all  
73 non-missing and non-filtered positions present in 91 (98%) of the 92 genomes. Bases in all non-  
74 core positions were replaced by the corresponding base in the PABL048 reference.

## 75 **Phylogenetic Analysis**

76 A maximum likelihood phylogenetic tree was constructed based on core genome  
77 alignments to PABL048 using RAxML (v8.2.11) [15]. Tree construction was performed using a

78 gamma model of rate heterogeneity (-m GTRGAMMA) with 1000 rapid bootstraps (-f a -N  
79 1000) to assess support. The phylogenetic tree was corrected for the impact of recombination  
80 using ClonalFrameML (v1.11-3-g4f12f23) with default settings [16]. The recombination-  
81 corrected phylogenetic tree was visualized and annotated using iTOL [17]. Predicted  
82 recombinant regions were then masked in the core genome alignment.

83 To model the evolution of the ST298\* subclade, a time-scaled phylogenetic tree was  
84 constructed for bacteria from this subclade with known isolation dates (Supplementary Tables 1  
85 and 2). Recombination-filtered core genome alignments of these isolates to the PABL048  
86 chromosome were extracted, and the recombination-corrected maximum likelihood tree was  
87 pruned to contain only these isolates using the ape package in R [18, 19]. These, along with  
88 isolation dates, were used as input for Bayesian analysis. Bayesian analysis was performed  
89 using BEAST (v2.5.1) with a gamma site model, strict clock rate, Yule tree prior, and chain  
90 length of 100 million, sampling every 1000 states [20]. Sampled states were analyzed with  
91 Tracer (v1.7.1) to determine the clock rate and last common ancestor date for ST298\*,  
92 considering the first 10% of states as burn-in [21]. SNVs/year were determined by multiplying  
93 estimated clock rate (SNVs per site per year) by PABL048 chromosome size. To construct the  
94 final time-scaled tree, sample trees were used to form a maximum clade credibility tree with  
95 node heights as common ancestor heights, using the first 10% of trees as burn-in. The time-  
96 scaled tree was visualized using FigTree (v1.4.4).

#### 97 **Determination of Heterogenous Plasmid Presence in ST298\* and Curing Plasmid from** 98 **PABL048**

99 ST298 isolates from NMH were screened for heterogenous resistance to gentamicin by  
100 patching individual colonies onto LB agar supplemented with gentamicin (50 µg/mL).  
101 Gentamicin-resistant and -sensitive colonies of PABL036 and PABL067 were selected for  
102 further analysis. These underwent MIC testing and whole genome sequencing as described

103 above. Plasmid presence and chromosomal SNVs were determined by read alignment to the  
104 PABL048 complete genome.

105 To cure pPABL048 from PABL048, we used a combination of sodium dodecyl sulfate  
106 (SDS) and elevated temperature [22]. Colonies were inoculated into 5 mL LB with 2% SDS,  
107 cultured at 42°C for approximately 24 hours, and plated on LB agar with irgasan (5 µg/mL).  
108 Colonies were then screened for loss of gentamicin resistance on LB agar supplemented with  
109 gentamicin (50 µg/mL) and irgasan (5 µg/mL) as a marker for pPABL048 presence. Loss of  
110 pPABL048 was confirmed through whole genome sequencing and alignment as described  
111 above.

### 112 **Characterization of in1697, pPABL048, and Plasmid Comparative Genomics**

113 The AMR integron in1697 was identified through detection of several AMR genes in  
114 multiple NMH ST298 isolates using the ResFinder database [23]. The sequence of this locus  
115 was referenced against the PABL048 complete genome to determine its genomic context.  
116 In1697 was further characterized through sequence alignment of translated coding sequences  
117 to the NCBI non-redundant protein database and through the INTEGRALL integron database  
118 [24], through which it was assigned the unique name in1697.

119 Plasmids similar to pPABL048 were identified using BLASTn, separately screening *P.*  
120 *aeruginosa*, non-*aeruginosa Pseudomonas*, and non-*Pseudomonas* Gammaproteobacteria  
121 sequences in the NCBI nucleotide database (nr/nt). This identified 16 plasmids with a minimum  
122 of query coverage of 70% (Supplementary Table 6). SPINE (v0.3) was used to determine the  
123 plasmid backbone of pPABL048 based on sequences conserved in 16/17 complete plasmids  
124 analyzed [25].

125 To identify other isolates which harbor plasmids similar to pPABL048, 3133  
126 *Pseudomonas* genus draft genomes cataloged by the *Pseudomonas* Genome Database  
127 (accessed January 2019) [26] were aligned to pPABL048 using NUCmer as described above  
128 and screened for genome sequences with >70% alignment by length (Supplementary Table 7).

129 A 98% “core” sequence alignment to pPABL048 (considering all non-missing and non-filtered  
130 positions in 62/63 sequences) was determined. A maximum likelihood phylogenetic tree was  
131 constructed to show relationships between these plasmids using RAxML (GTRGamma model,  
132 1000 rapid bootstraps) [15].

### 133 **Mutational Resistance Analysis**

134 To examine the role of mutational resistance in the observed AMR phenotype, a panel of  
135 PABL048 genes was screened for mutations known to confer resistance in *P. aeruginosa* [27].  
136 In cases where resistance is imparted through specific gain-of-function mutations, translated  
137 coding sequences were screened for previously reported alleles known to be involved in  
138 resistance. In cases where resistance is conferred from loss-of-function mutations (e.g. gene  
139 disruption), translated coding sequences were compared to that of PAO1 as a reference to  
140 assess for gross changes in the amino acid sequence. The genomes of ceftazidime-resistant  
141 ST298\* isolates PS1793, PS1796, and PS1797 were similarly screened to investigate  
142 mechanisms of ceftazidime resistance. OprD protein sequences for isolates in the ST298\*  
143 subclade were extracted, and multiple sequence alignment was performed using CLC  
144 Sequence Viewer (v8.0) with default parameters.

145



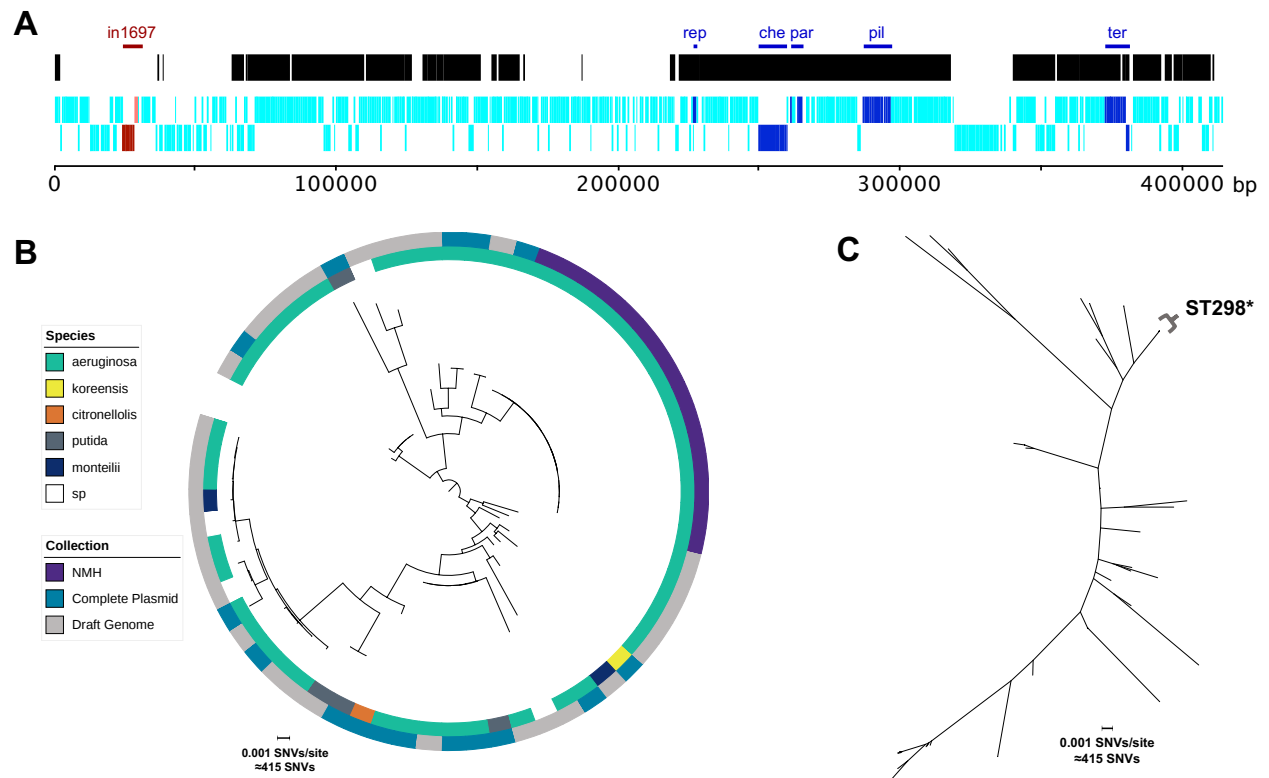

152

153 **Supplementary Figure 2.** Comparative genomic analysis of pPABL048. (A) Linear diagram of  
 154 pPABL084 showing coding sequences (light blue) and the plasmid backbone (black) defined as  
 155 positions present in at least 16 of 17 similar plasmids. In1697 is indicated in red. Plasmid  
 156 backbone features including putative replication (rep) and partitioning (par) genes, chemotaxis  
 157 locus (che), putative pili locus (pil), and tellurium resistance locus (ter) are indicated in dark  
 158 blue. (B) Midpoint-rooted circular and (C) unrooted radial maximum likelihood phylogenetic trees  
 159 based on alignment of 63 *Pseudomonas* genus sequences to pPABL048. Sequences (ST298\*  
 160 read alignments, complete plasmids, and draft genomes) with >70% alignment to pPABL048 by  
 161 length were included, and SNVs in positions present in 62/63 alignments (plasmid backbone)  
 162 were considered. The circular tree is annotated with species (inner ring) and collection (outer  
 163 ring). On the radial tree, pPABL048 alignments from ST298\* isolates are indicated.



164 REFERENCES

165 1. Wiegand I, Hilpert K, Hancock REW. Agar and broth dilution methods to determine the  
166 minimal inhibitory concentration (MIC) of antimicrobial substances. *Nature Protocols*  
167 **2008**; 3: 163.

168 2. Performance standards for antimicrobial susceptibility testing: 28th informational  
169 supplement, M100-S28. Wayne, PA: Clinical and Laboratory Standards Institute, **2018**.

170 3. Magiorakos AP, Srinivasan A, Carey RB, et al. Multidrug-resistant, extensively drug-  
171 resistant and pandrug-resistant bacteria: an international expert proposal for interim  
172 standard definitions for acquired resistance. *Clinical Microbiology and Infection* **2012**;  
173 18(3): 268-81.

174 4. Francisco AP, Bugalho M, Ramirez M, Carriço JA. Global optimal eBURST analysis of  
175 multilocus typing data using a graphic matroid approach. *BMC Bioinformatics* **2009**;  
176 10(1): 152.

177 5. Nascimento M, Sousa A, Ramirez M, Francisco AP, Carriço JA, Vaz C. PHYLOViZ 2.0:  
178 providing scalable data integration and visualization for multiple phylogenetic inference  
179 methods. *Bioinformatics* **2016**; 33(1): 128-9.

180 6. Jolley KA, Bray JE, Maiden MCJ. Open-access bacterial population genomics: BIGSdb  
181 software, the PubMLST.org website and their applications. *Wellcome open research*  
182 **2018**; 3: 124-.

183 7. Tatusova T, DiCuccio M, Badretdin A, et al. NCBI prokaryotic genome annotation  
184 pipeline. *Nucleic acids research* **2016**; 44(14): 6614-24.

185 8. Liu B, Zheng D, Jin Q, Chen L, Yang J. VFDB 2019: a comparative pathogenomic  
186 platform with an interactive web interface. *Nucleic Acids Research* **2018**; 47(D1): D687-  
187 D92.

188 9. Bolger AM, Lohse M, Usadel B. Trimmomatic: a flexible trimmer for Illumina sequence  
189 data. *Bioinformatics* **2014**; 30(15): 2114-20.

190 10. Bankevich A, Nurk S, Antipov D, et al. SPAdes: a new genome assembly algorithm and  
191 its applications to single-cell sequencing. *J Comput Biol* **2012**; 19(5): 455-77.

192 11. Li H. Aligning sequence reads, clone sequences and assembly contigs with BWA-MEM.  
193 arXiv preprint arXiv:13033997 **2013**.

194 12. Li H, Handsaker B, Wysoker A, et al. The Sequence Alignment/Map format and  
195 SAMtools. *Bioinformatics* **2009**; 25(16): 2078-9.

196 13. Li H. A statistical framework for SNP calling, mutation discovery, association mapping  
197 and population genetical parameter estimation from sequencing data. *Bioinformatics*  
198 **2011**; 27(21): 2987-93.

199 14. Kurtz S, Phillippy A, Delcher AL, et al. Versatile and open software for comparing large  
200 genomes. *Genome Biology* **2004**; 5(2): R12.

201 15. Stamatakis A. RAxML version 8: a tool for phylogenetic analysis and post-analysis of  
202 large phylogenies. *Bioinformatics* **2014**; 30(9): 1312-3.

203 16. Didelot X, Wilson DJ. ClonalFrameML: efficient inference of recombination in whole  
204 bacterial genomes. *PLOS Computational Biology* **2015**; 11(2): e1004041.

205 17. Letunic I, Bork P. Interactive Tree Of Life (iTOL) v4: recent updates and new  
206 developments. **2019**.

207 18. Paradis E, Claude J, Strimmer K. APE: Analyses of Phylogenetics and Evolution in R  
208 language. *Bioinformatics* **2004**; 20(2): 289-90.

209 19. R Core Team. R: A Language and Environment for Statistical Computing. Vienna,  
210 Austria: R Foundation for Statistical Computing, **2016**.

211 20. Bouckaert R, Heled J, Kühnert D, et al. BEAST 2: a software platform for bayesian  
212 evolutionary analysis. *PLOS Computational Biology* **2014**; 10(4): e1003537.

- 213 21. Rambaut A, Drummond AJ, Xie D, Baele G, Suchard MA. Posterior summarization in  
214 bayesian phylogenetics using Tracer 1.7. *Systematic Biology* **2018**; 67(5): 901-4.  
215 22. Trevors JT. Plasmid curing in bacteria. *FEMS Microbiology Letters* **1986**; 32(3-4): 149-  
216 57.  
217 23. Zankari E, Hasman H, Cosentino S, et al. Identification of acquired antimicrobial  
218 resistance genes. *The Journal of antimicrobial chemotherapy* **2012**; 67(11): 2640-4.  
219 24. Moura A, Correia A, Pereira C, Henriques I, Soares M, Leitão N. INTEGRALL: a  
220 database and search engine for integrons, integrases and gene cassettes.  
221 *Bioinformatics* **2009**; 25(8): 1096-8.  
222 25. Ozer EA, Allen JP, Hauser AR. Characterization of the core and accessory genomes of  
223 *Pseudomonas aeruginosa* using bioinformatic tools Spine and AGEnt. *BMC Genomics*  
224 **2014**; 15(1): 737.  
225 26. Winsor GL, Griffiths EJ, Lo R, Dhillon BK, Shay JA, Brinkman FSL. Enhanced  
226 annotations and features for comparing thousands of *Pseudomonas* genomes in the  
227 *Pseudomonas* genome database. *Nucleic acids research* **2016**; 44(D1): D646-D53.  
228 27. López-Causapé C, Cabot G, Del Barrio-Tofiño E, Oliver A. The versatile mutational  
229 resistome of *Pseudomonas aeruginosa*. *Frontiers in microbiology* **2018**; 9: 685-  
230
